# Supplementary material
Source: publisher figshare collection journal article supplement (https://frontiersin.figshare.com/ndownloader/files/19886972)
Supplement: Supplementary file [file 19886972]

## *Supplementary Material*

# **Theoretical Study of the Antioxidant Activity of Quercetin Oxidation Products**

**Alejandro Vasquez-Espinal<sup>1</sup>, Osvaldo Yañez<sup>1</sup>, Edison Osorio<sup>2</sup>, Carlos Areche<sup>3</sup>, Olimpo García<sup>2</sup>, Lina María Ruiz<sup>4</sup>, Bruce K. Cassels<sup>3\*</sup> and William Tiznado<sup>1\*</sup>**

<sup>1</sup> Computational and Theoretical Chemistry Group, Departamento de Ciencias Químicas, Facultad de Ciencias Exactas, Universidad Andres Bello, República 498, Santiago, Chile

<sup>2</sup> Facultad de Ciencias Naturales y Matemáticas, Universidad de Ibagué, Carrera 22 calle 67, Ibagué, Colombia

<sup>3</sup> Departamento de Química, Facultad de Ciencias, Universidad de Chile, Las Palmeras 3425, Ñuñoa, Santiago, Chile

<sup>4</sup> Instituto de Ciencias Biomédicas, Facultad Ciencias de la Salud, Universidad Autónoma de Chile, Llano Subercaseaux 2801, San Miguel, Santiago, Chile

# 1 Supplementary Data

Cartesian coordinates of the lowest energy conformers of Quercetin and its main oxidized products and their corresponding relative energies at the M05-2X/6-31+G(d,p) level including the zero-point energy (ZPE) correction.

| Q                                                                                    |              |              |                           |
|--------------------------------------------------------------------------------------|--------------|--------------|---------------------------|
| C                                                                                    | 1.622730000  | 0.708915000  | -0.101299000              |
| C                                                                                    | 2.368305000  | -0.470304000 | 0.026552000               |
| C                                                                                    | 2.212622000  | 1.961315000  | -0.201683000              |
| C                                                                                    | 3.783664000  | -0.362807000 | 0.057369000               |
| C                                                                                    | 3.601836000  | 2.017019000  | -0.171222000              |
| C                                                                                    | 4.397115000  | 0.869063000  | -0.042062000              |
| C                                                                                    | -0.423879000 | -0.507401000 | -0.042930000              |
| C                                                                                    | 0.241618000  | -1.685330000 | 0.091185000               |
| O                                                                                    | 0.266854000  | 0.665672000  | -0.138438000              |
| C                                                                                    | 1.685866000  | -1.727741000 | 0.132925000               |
| C                                                                                    | -1.875374000 | -0.304170000 | -0.081035000              |
| C                                                                                    | -2.741649000 | -1.292706000 | -0.561310000              |
| C                                                                                    | -2.397174000 | 0.924672000  | 0.354151000               |
| C                                                                                    | -4.112874000 | -1.057121000 | -0.601125000              |
| C                                                                                    | -3.760758000 | 1.149425000  | 0.317761000               |
| C                                                                                    | -4.625297000 | 0.156461000  | -0.161446000              |
| O                                                                                    | -5.955393000 | 0.473144000  | -0.160753000              |
| O                                                                                    | -4.256494000 | 2.350622000  | 0.756043000               |
| O                                                                                    | 2.268992000  | -2.834106000 | 0.272169000               |
| O                                                                                    | -0.407347000 | -2.876329000 | 0.227584000               |
| O                                                                                    | 4.544901000  | -1.475096000 | 0.183805000               |
| O                                                                                    | 4.263665000  | 3.200532000  | -0.265932000              |
| H                                                                                    | 1.606784000  | 2.852465000  | -0.300548000              |
| H                                                                                    | 5.475425000  | 0.951322000  | -0.020173000              |
| H                                                                                    | -2.355459000 | -2.233979000 | -0.922824000              |
| H                                                                                    | -1.750665000 | 1.706327000  | 0.730809000               |
| H                                                                                    | -4.792750000 | -1.810845000 | -0.980714000              |
| H                                                                                    | -6.482398000 | -0.259090000 | -0.508806000              |
| H                                                                                    | -5.220314000 | 2.351575000  | 0.666624000               |
| H                                                                                    | 0.280204000  | -3.552341000 | 0.358136000               |
| H                                                                                    | 3.940206000  | -2.248375000 | 0.247540000               |
| H                                                                                    | 3.637040000  | 3.931683000  | -0.360856000              |
| 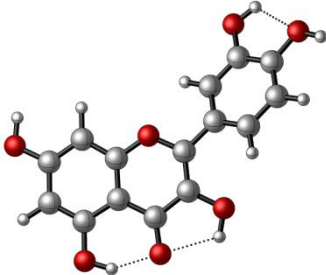  |              |              |                           |
|                                                                                      |              |              | $\Delta E = 0.0$ kcal/mol |
| C                                                                                    | -1.639448000 | 0.713435000  | 0.131773000               |
| C                                                                                    | -2.356268000 | -0.479508000 | -0.035539000              |
| C                                                                                    | -2.253988000 | 1.948607000  | 0.267519000               |
| C                                                                                    | -3.772763000 | -0.398663000 | -0.069472000              |
| C                                                                                    | -3.644286000 | 1.978432000  | 0.229845000               |
| C                                                                                    | -4.413465000 | 0.818335000  | 0.064152000               |
| C                                                                                    | 0.417127000  | -0.469168000 | 0.051049000               |
| C                                                                                    | -0.211916000 | -1.655217000 | -0.156533000              |
| O                                                                                    | -0.280573000 | 0.695424000  | 0.176801000               |
| C                                                                                    | -1.658612000 | -1.729427000 | -0.193990000              |
| C                                                                                    | 1.870061000  | -0.262026000 | 0.131182000               |
| C                                                                                    | 2.680584000  | -1.128232000 | 0.870333000               |
| C                                                                                    | 2.438534000  | 0.838812000  | -0.526549000              |
| C                                                                                    | 4.053271000  | -0.905763000 | 0.941641000               |
| C                                                                                    | 3.803890000  | 1.050590000  | -0.455079000              |
| C                                                                                    | 4.617204000  | 0.175359000  | 0.279839000               |
| O                                                                                    | 5.965577000  | 0.380455000  | 0.354839000               |
| O                                                                                    | 4.450869000  | 2.087470000  | -1.074628000              |
| O                                                                                    | -2.252169000 | -2.821255000 | -0.368586000              |
| O                                                                                    | 0.425193000  | -2.848196000 | -0.361560000              |
| O                                                                                    | -4.510971000 | -1.519458000 | -0.235064000              |
| O                                                                                    | -4.234512000 | 3.196335000  | 0.362151000               |
| H                                                                                    | -1.673244000 | 2.850994000  | 0.397502000               |
| H                                                                                    | -5.494740000 | 0.869626000  | 0.037159000               |
| H                                                                                    | 2.245241000  | -1.956340000 | 1.415646000               |
| H                                                                                    | 1.823066000  | 1.520450000  | -1.102005000              |
|  |              |              |                           |
|                                                                                      |              |              | $\Delta E = 2.4$ kcal/mol |

|   |              |              |              |                                                                                    |                                   |
|---|--------------|--------------|--------------|------------------------------------------------------------------------------------|-----------------------------------|
| H | 4.694732000  | -1.561146000 | 1.516893000  |                                                                                    |                                   |
| H | 6.204244000  | 1.169051000  | -0.154054000 |                                                                                    |                                   |
| H | 3.823802000  | 2.634091000  | -1.567310000 |                                                                                    |                                   |
| H | 1.366216000  | -2.710467000 | -0.542855000 |                                                                                    |                                   |
| H | -3.878923000 | -2.273933000 | -0.323905000 |                                                                                    |                                   |
| H | -5.197252000 | 3.118080000  | 0.310283000  |                                                                                    |                                   |
| C | -1.756896000 | -0.701447000 | 0.059578000  | 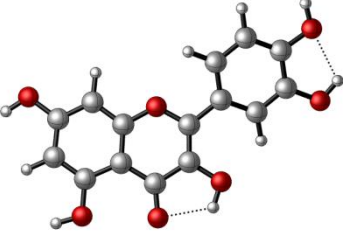 | $\Delta E = 4.6 \text{ kcal/mol}$ |
| C | -2.369793000 | 0.562471000  | -0.022282000 |                                                                                    |                                   |
| C | -2.467091000 | -1.891009000 | 0.150794000  |                                                                                    |                                   |
| C | -3.790095000 | 0.586105000  | -0.006606000 |                                                                                    |                                   |
| C | -3.850874000 | -1.813165000 | 0.159740000  |                                                                                    |                                   |
| C | -4.520058000 | -0.584669000 | 0.080622000  |                                                                                    |                                   |
| C | 0.430757000  | 0.240208000  | -0.035506000 |                                                                                    |                                   |
| C | -0.089355000 | 1.488877000  | -0.120256000 |                                                                                    |                                   |
| O | -0.406162000 | -0.833422000 | 0.059758000  |                                                                                    |                                   |
| C | -1.525069000 | 1.732589000  | -0.117362000 |                                                                                    |                                   |
| C | 1.843831000  | -0.152914000 | -0.059123000 |                                                                                    |                                   |
| C | 2.190887000  | -1.449194000 | -0.461267000 |                                                                                    |                                   |
| C | 2.853045000  | 0.743266000  | 0.325025000  |                                                                                    |                                   |
| C | 3.525036000  | -1.840566000 | -0.490096000 |                                                                                    |                                   |
| C | 4.178696000  | 0.346703000  | 0.293610000  |                                                                                    |                                   |
| C | 4.520805000  | -0.947340000 | -0.115779000 |                                                                                    |                                   |
| O | 5.855245000  | -1.247773000 | -0.112838000 |                                                                                    |                                   |
| O | 5.150409000  | 1.236840000  | 0.675943000  |                                                                                    |                                   |
| O | -1.909156000 | 2.915831000  | -0.210998000 |                                                                                    |                                   |
| O | 0.689874000  | 2.599890000  | -0.247566000 |                                                                                    |                                   |
| O | -4.409551000 | 1.790690000  | -0.078504000 |                                                                                    |                                   |
| O | -4.540472000 | -2.980555000 | 0.249805000  |                                                                                    |                                   |
| H | -1.951835000 | -2.839224000 | 0.213291000  |                                                                                    |                                   |
| H | -5.603752000 | -0.551481000 | 0.089929000  |                                                                                    |                                   |
| H | 1.425768000  | -2.151717000 | -0.760831000 |                                                                                    |                                   |
| H | 2.622565000  | 1.743227000  | 0.662265000  |                                                                                    |                                   |
| H | 3.801731000  | -2.839746000 | -0.805841000 |                                                                                    |                                   |
| H | 5.996709000  | -2.154999000 | -0.415900000 |                                                                                    |                                   |
| H | 6.019432000  | 0.817818000  | 0.599222000  |                                                                                    |                                   |
| H | 0.066596000  | 3.346207000  | -0.323953000 |                                                                                    |                                   |
| H | -5.369014000 | 1.670632000  | -0.037668000 |                                                                                    |                                   |
| H | -5.492646000 | -2.812234000 | 0.248115000  |                                                                                    |                                   |

| FI |              |              |              |                                                                                      |                                   |
|----|--------------|--------------|--------------|--------------------------------------------------------------------------------------|-----------------------------------|
| C  | 1.664148000  | -0.077281000 | 0.850705000  | 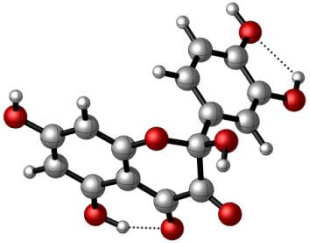 | $\Delta E = 0.0 \text{ kcal/mol}$ |
| C  | 1.755780000  | 0.558140000  | -0.411529000 |                                                                                      |                                   |
| C  | 2.487012000  | -1.126653000 | 1.193804000  |                                                                                      |                                   |
| C  | 2.725167000  | 0.075574000  | -1.335823000 |                                                                                      |                                   |
| C  | 3.427556000  | -1.565580000 | 0.250738000  |                                                                                      |                                   |
| C  | 3.553767000  | -0.982300000 | -1.010735000 |                                                                                      |                                   |
| C  | -0.420613000 | 1.017869000  | 1.386843000  |                                                                                      |                                   |
| C  | -0.033824000 | 2.111620000  | 0.389408000  |                                                                                      |                                   |
| O  | 0.777076000  | 0.342596000  | 1.803550000  |                                                                                      |                                   |
| C  | 0.934038000  | 1.687379000  | -0.714668000 |                                                                                      |                                   |
| C  | -1.390619000 | 0.060578000  | 0.717545000  |                                                                                      |                                   |
| C  | -1.232384000 | -1.318450000 | 0.821364000  |                                                                                      |                                   |
| C  | -2.487760000 | 0.598648000  | 0.037258000  |                                                                                      |                                   |
| C  | -2.175534000 | -2.166438000 | 0.242043000  |                                                                                      |                                   |
| C  | -3.423246000 | -0.247275000 | -0.534111000 |                                                                                      |                                   |
| C  | -3.264782000 | -1.635754000 | -0.435596000 |                                                                                      |                                   |
| O  | 2.858876000  | 0.648660000  | -2.546730000 |                                                                                      |                                   |
| O  | 4.257792000  | -2.593150000 | 0.530186000  |                                                                                      |                                   |
| O  | 0.965696000  | 2.347887000  | -1.758150000 |                                                                                      |                                   |
| O  | -0.484891000 | 3.230036000  | 0.431092000  |                                                                                      |                                   |
| O  | -1.014633000 | 1.541753000  | 2.522963000  |                                                                                      |                                   |
| O  | -4.237399000 | -2.388125000 | -1.035558000 |                                                                                      |                                   |
| O  | -4.499009000 | 0.286059000  | -1.192861000 |                                                                                      |                                   |
| H  | 2.399163000  | -1.603122000 | 2.161510000  |                                                                                      |                                   |
| H  | 4.289065000  | -1.345229000 | -1.715506000 |                                                                                      |                                   |
| H  | -0.394359000 | -1.743136000 | 1.356836000  |                                                                                      |                                   |
| H  | -2.636965000 | 1.669233000  | -0.045466000 |                                                                                      |                                   |
| H  | -2.071264000 | -3.242661000 | 0.315894000  |                                                                                      |                                   |
| H  | 2.232965000  | 1.399472000  | -2.616521000 |                                                                                      |                                   |

|   |              |              |              |                                                                                      |                                   |
|---|--------------|--------------|--------------|--------------------------------------------------------------------------------------|-----------------------------------|
| H | 4.095616000  | -2.931960000 | 1.422311000  |                                                                                      |                                   |
| H | -0.495932000 | 2.293038000  | 2.851392000  |                                                                                      |                                   |
| H | -4.054445000 | -3.331874000 | -0.932408000 |                                                                                      |                                   |
| H | -5.064166000 | -0.429959000 | -1.517450000 |                                                                                      |                                   |
| C | 1.776523000  | -0.729223000 | 0.111511000  | 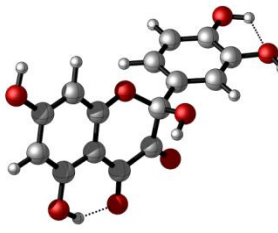   | $\Delta E = 1.8 \text{ kcal/mol}$ |
| C | 2.357373000  | 0.537167000  | -0.146582000 |                                                                                      |                                   |
| C | 2.545855000  | -1.861167000 | 0.253057000  |                                                                                      |                                   |
| C | 3.775885000  | 0.613588000  | -0.256911000 |                                                                                      |                                   |
| C | 3.938271000  | -1.737385000 | 0.129073000  |                                                                                      |                                   |
| C | 4.563123000  | -0.514261000 | -0.115845000 |                                                                                      |                                   |
| C | -0.422597000 | 0.179455000  | 0.565149000  |                                                                                      |                                   |
| C | 0.033179000  | 1.488838000  | -0.108783000 |                                                                                      |                                   |
| O | 0.422250000  | -0.902335000 | 0.175025000  |                                                                                      |                                   |
| C | 1.536765000  | 1.690289000  | -0.323175000 |                                                                                      |                                   |
| C | -1.825645000 | -0.184806000 | 0.149577000  |                                                                                      |                                   |
| C | -2.043478000 | -0.880507000 | -1.038057000 |                                                                                      |                                   |
| C | -2.907438000 | 0.252004000  | 0.916198000  |                                                                                      |                                   |
| C | -3.344112000 | -1.155357000 | -1.454291000 |                                                                                      |                                   |
| C | -4.199850000 | -0.025584000 | 0.497338000  |                                                                                      |                                   |
| C | -4.422356000 | -0.730183000 | -0.690852000 |                                                                                      |                                   |
| O | 4.378828000  | 1.790090000  | -0.506365000 |                                                                                      |                                   |
| O | 4.740871000  | -2.815711000 | 0.247055000  |                                                                                      |                                   |
| O | 1.935663000  | 2.822104000  | -0.618868000 |                                                                                      |                                   |
| O | -0.742792000 | 2.366992000  | -0.394260000 |                                                                                      |                                   |
| O | -0.384540000 | 0.372785000  | 1.951611000  |                                                                                      |                                   |
| O | -5.697506000 | -1.005202000 | -1.108002000 |                                                                                      |                                   |
| O | -5.322524000 | 0.356246000  | 1.188574000  |                                                                                      |                                   |
| H | 2.084175000  | -2.820511000 | 0.446902000  |                                                                                      |                                   |
| H | 5.638877000  | -0.451546000 | -0.204564000 |                                                                                      |                                   |
| H | -1.207515000 | -1.210525000 | -1.640225000 |                                                                                      |                                   |
| H | -2.756133000 | 0.806736000  | 1.833588000  |                                                                                      |                                   |
| H | -3.532891000 | -1.699599000 | -2.371137000 |                                                                                      |                                   |
| H | 3.694622000  | 2.483439000  | -0.617671000 |                                                                                      |                                   |
| H | 4.220719000  | -3.617732000 | 0.399370000  |                                                                                      |                                   |
| H | 0.454809000  | 0.760600000  | 2.241525000  |                                                                                      |                                   |
| H | -6.329924000 | -0.628551000 | -0.478940000 |                                                                                      |                                   |
| H | -5.077718000 | 0.840750000  | 1.988557000  |                                                                                      |                                   |
| C | 1.659597000  | -0.740005000 | 0.020204000  |  | $\Delta E = 2.4 \text{ kcal/mol}$ |
| C | 2.318096000  | 0.503379000  | -0.139009000 |                                                                                      |                                   |
| C | 2.347134000  | -1.928152000 | 0.037897000  |                                                                                      |                                   |
| C | 3.732133000  | 0.496756000  | -0.278245000 |                                                                                      |                                   |
| C | 3.743520000  | -1.886631000 | -0.106161000 |                                                                                      |                                   |
| C | 4.444641000  | -0.691387000 | -0.258987000 |                                                                                      |                                   |
| C | -0.405051000 | 0.275574000  | 0.683699000  |                                                                                      |                                   |
| C | 0.057184000  | 1.586916000  | 0.026051000  |                                                                                      |                                   |
| O | 0.290059000  | -0.816948000 | 0.103234000  |                                                                                      |                                   |
| C | 1.569902000  | 1.719471000  | -0.182470000 |                                                                                      |                                   |
| C | -1.878317000 | 0.010512000  | 0.508387000  |                                                                                      |                                   |
| C | -2.733859000 | -0.102051000 | 1.597630000  |                                                                                      |                                   |
| C | -2.373021000 | -0.126153000 | -0.793781000 |                                                                                      |                                   |
| C | -4.091473000 | -0.353284000 | 1.391336000  |                                                                                      |                                   |
| C | -3.718546000 | -0.380144000 | -0.993246000 |                                                                                      |                                   |
| C | -4.584579000 | -0.491876000 | 0.104097000  |                                                                                      |                                   |
| O | 4.410702000  | 1.647443000  | -0.436826000 |                                                                                      |                                   |
| O | 4.380391000  | -3.076835000 | -0.085872000 |                                                                                      |                                   |
| O | 2.037638000  | 2.846242000  | -0.377221000 |                                                                                      |                                   |
| O | -0.681966000 | 2.505762000  | -0.227143000 |                                                                                      |                                   |
| O | 0.026979000  | 0.347295000  | 2.021143000  |                                                                                      |                                   |
| O | -5.917119000 | -0.738172000 | -0.088405000 |                                                                                      |                                   |
| O | -4.295493000 | -0.535751000 | -2.227724000 |                                                                                      |                                   |
| H | 1.830860000  | -2.870215000 | 0.158319000  |                                                                                      |                                   |
| H | 5.521486000  | -0.685377000 | -0.368750000 |                                                                                      |                                   |
| H | -2.363226000 | -0.006556000 | 2.609211000  |                                                                                      |                                   |
| H | -1.717172000 | -0.039200000 | -1.654087000 |                                                                                      |                                   |
| H | -4.773655000 | -0.445846000 | 2.226973000  |                                                                                      |                                   |
| H | 3.773770000  | 2.392450000  | -0.460968000 |                                                                                      |                                   |
| H | 5.336016000  | -2.957465000 | -0.184843000 |                                                                                      |                                   |
| H | -0.411151000 | 1.078071000  | 2.483078000  |                                                                                      |                                   |
| H | -6.097628000 | -0.810615000 | -1.036858000 |                                                                                      |                                   |
| H | -3.632987000 | -0.445096000 | -2.925985000 |                                                                                      |                                   |

| Bf                                                                                   |              |              |                           |
|--------------------------------------------------------------------------------------|--------------|--------------|---------------------------|
| C                                                                                    | -1.744544000 | 0.244193000  | -0.882303000              |
| C                                                                                    | -1.881233000 | 0.364999000  | 0.505602000               |
| C                                                                                    | -2.466379000 | -0.651744000 | -1.632275000              |
| C                                                                                    | -2.793643000 | -0.448267000 | 1.197575000               |
| C                                                                                    | -3.372128000 | -1.449086000 | -0.908145000              |
| C                                                                                    | -3.548218000 | -1.361391000 | 0.481531000               |
| O                                                                                    | -0.784733000 | 1.086204000  | -1.388538000              |
| C                                                                                    | -0.312531000 | 1.931598000  | -0.322603000              |
| C                                                                                    | -0.949920000 | 1.344725000  | 0.963877000               |
| C                                                                                    | 1.237790000  | 1.963343000  | -0.381799000              |
| C                                                                                    | 2.046471000  | 0.751867000  | -0.216183000              |
| C                                                                                    | 3.703340000  | -1.470291000 | 0.073204000               |
| C                                                                                    | 4.261378000  | -0.220394000 | -0.179493000              |
| C                                                                                    | 2.311305000  | -1.611501000 | 0.183277000               |
| C                                                                                    | 3.438019000  | 0.884711000  | -0.323550000              |
| C                                                                                    | 1.487705000  | -0.511671000 | 0.040159000               |
| O                                                                                    | 1.730146000  | 3.062806000  | -0.595071000              |
| O                                                                                    | -0.693542000 | 1.737085000  | 2.094928000               |
| O                                                                                    | 4.517610000  | -2.546743000 | 0.210201000               |
| O                                                                                    | -0.809562000 | 3.214658000  | -0.464658000              |
| O                                                                                    | -4.138861000 | -2.366525000 | -1.540685000              |
| O                                                                                    | -2.936221000 | -0.350816000 | 2.536340000               |
| O                                                                                    | 1.861792000  | -2.881151000 | 0.431457000               |
| H                                                                                    | -2.353399000 | -0.750647000 | -2.703650000              |
| H                                                                                    | -4.262573000 | -2.005269000 | 0.976150000               |
| H                                                                                    | 5.337345000  | -0.134496000 | -0.259575000              |
| H                                                                                    | 3.867683000  | 1.857346000  | -0.520563000              |
| H                                                                                    | 0.422143000  | -0.673521000 | 0.132004000               |
| H                                                                                    | 3.990953000  | -3.338570000 | 0.397093000               |
| H                                                                                    | -0.079064000 | 3.775495000  | -0.785887000              |
| H                                                                                    | -3.957220000 | -2.376236000 | -2.491303000              |
| H                                                                                    | -2.340963000 | 0.332048000  | 2.887039000               |
| H                                                                                    | 0.897602000  | -2.896835000 | 0.503658000               |
| C                                                                                    | 2.523936000  | -0.659149000 | 0.550537000               |
| C                                                                                    | 2.362701000  | 0.596711000  | -0.049574000              |
| C                                                                                    | 3.687147000  | -1.384848000 | 0.473675000               |
| C                                                                                    | 3.430718000  | 1.182402000  | -0.748789000              |
| C                                                                                    | 4.728941000  | -0.776781000 | -0.246586000              |
| C                                                                                    | 4.623141000  | 0.484468000  | -0.853878000              |
| O                                                                                    | 1.405699000  | -1.061822000 | 1.226809000               |
| C                                                                                    | 0.357217000  | -0.108142000 | 1.010365000               |
| C                                                                                    | 1.043394000  | 1.057514000  | 0.231897000               |
| C                                                                                    | -0.706359000 | -0.780911000 | 0.104725000               |
| C                                                                                    | -2.101741000 | -0.308604000 | 0.092958000               |
| C                                                                                    | -4.771481000 | 0.467427000  | -0.098042000              |
| C                                                                                    | -3.847052000 | 1.311279000  | 0.504503000               |
| C                                                                                    | -4.361692000 | -0.773847000 | -0.614025000              |
| C                                                                                    | -2.515826000 | 0.924925000  | 0.610664000               |
| C                                                                                    | -3.039191000 | -1.153777000 | -0.528827000              |
| O                                                                                    | -0.323477000 | -1.697463000 | -0.606523000              |
| O                                                                                    | 0.493245000  | 2.117959000  | -0.038863000              |
| O                                                                                    | -6.072419000 | 0.850197000  | -0.184648000              |
| O                                                                                    | -0.206392000 | 0.265742000  | 2.214863000               |
| O                                                                                    | 5.880361000  | -1.482527000 | -0.328863000              |
| O                                                                                    | 3.314971000  | 2.399776000  | -1.320726000              |
| O                                                                                    | -5.351317000 | -1.531985000 | -1.184520000              |
| H                                                                                    | 3.814066000  | -2.353692000 | 0.934904000               |
| H                                                                                    | 5.461559000  | 0.905215000  | -1.394326000              |
| H                                                                                    | -4.183015000 | 2.265837000  | 0.888521000               |
| H                                                                                    | -1.810503000 | 1.593520000  | 1.079092000               |
| H                                                                                    | -2.729584000 | -2.109362000 | -0.934655000              |
| H                                                                                    | -6.586901000 | 0.159750000  | -0.629329000              |
| H                                                                                    | 0.438214000  | 0.769938000  | 2.734489000               |
| H                                                                                    | 6.544568000  | -0.996680000 | -0.837459000              |
| H                                                                                    | 2.432328000  | 2.768118000  | -1.155460000              |
| H                                                                                    | -4.989223000 | -2.353664000 | -1.543638000              |
| 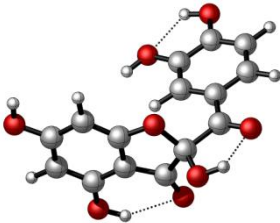   |              |              | $\Delta E = 0.0$ kcal/mol |
|  |              |              | $\Delta E = 1.3$ kcal/mol |

|   |              |              |              |
|---|--------------|--------------|--------------|
| C | -1.773457000 | 0.294866000  | -0.847400000 |
| C | -1.847069000 | 0.364384000  | 0.552055000  |
| C | -2.544771000 | -0.545317000 | -1.611479000 |
| C | -2.760681000 | -0.458961000 | 1.232609000  |
| C | -3.449145000 | -1.347279000 | -0.897937000 |
| C | -3.568107000 | -1.316990000 | 0.499635000  |
| O | -0.815578000 | 1.129577000  | -1.370798000 |
| C | -0.289192000 | 1.933970000  | -0.304856000 |
| C | -0.870460000 | 1.316894000  | 0.995308000  |
| C | 1.257585000  | 1.948365000  | -0.411055000 |
| C | 2.056975000  | 0.728916000  | -0.251041000 |
| C | 3.691017000  | -1.507280000 | 0.082873000  |
| C | 4.259731000  | -0.241766000 | -0.040176000 |
| C | 2.296201000  | -1.659297000 | 0.032708000  |
| C | 3.449809000  | 0.870436000  | -0.208834000 |
| C | 1.487283000  | -0.549575000 | -0.128343000 |
| O | 1.759892000  | 3.043124000  | -0.625679000 |
| O | -0.526347000 | 1.686308000  | 2.107828000  |
| O | 4.426143000  | -2.635072000 | 0.252673000  |
| O | -0.773318000 | 3.228169000  | -0.388756000 |
| O | -4.222381000 | -2.174439000 | -1.637936000 |
| O | -2.802190000 | -0.369258000 | 2.576932000  |
| O | 1.811143000  | -2.934140000 | 0.148052000  |
| H | -2.474671000 | -0.595693000 | -2.688576000 |
| H | -4.284072000 | -1.960451000 | 0.997503000  |
| H | 5.338005000  | -0.143667000 | 0.002304000  |
| H | 3.892381000  | 1.852915000  | -0.299066000 |
| H | 0.419594000  | -0.716932000 | -0.169775000 |
| H | 5.367785000  | -2.414612000 | 0.283919000  |
| H | -0.053452000 | 3.785634000  | -0.737845000 |
| H | -4.822083000 | -2.684842000 | -1.075308000 |
| H | -3.463011000 | -0.975957000 | 2.941487000  |
| H | 0.846294000  | -2.928734000 | 0.082435000  |

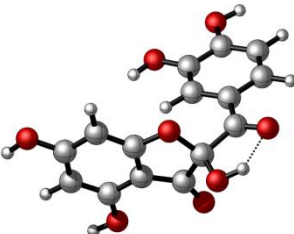

$\Delta E = 1.6 \text{ kcal/mol}$

## 2 Supplementary Figures

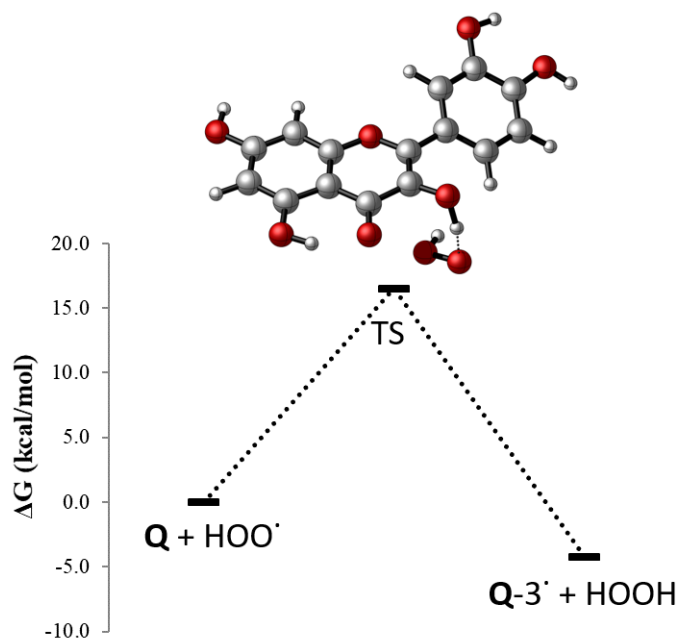

**Supplementary Figure 1.** Gibbs free energy profile of the hydrogen atom transfer reaction between **Q** and  $HOO^\bullet$  at the 3-OH position. The structure of the corresponding transition state is shown at the top.

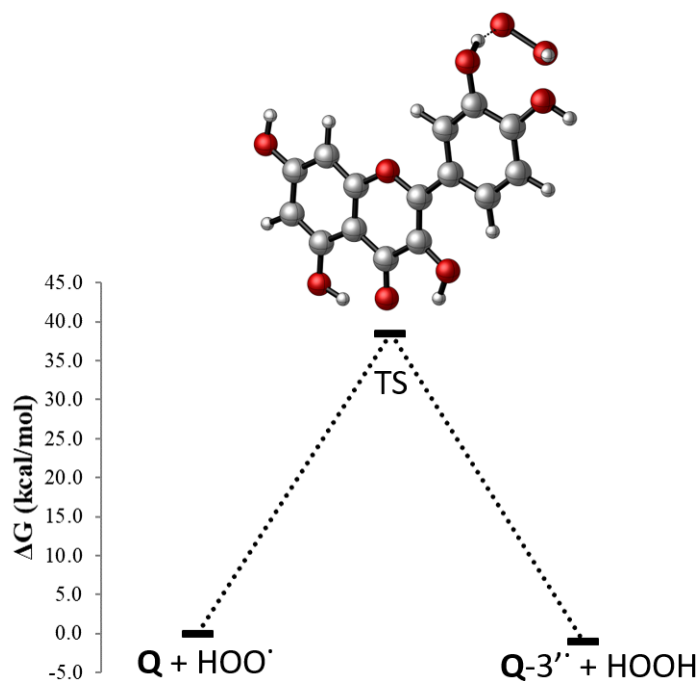

**Supplementary Figure 2.** Gibbs free energy profile of the hydrogen atom transfer reaction between **Q** and  $HOO^\bullet$  at the 3'-OH position. The structure of the corresponding transition state is shown at the top.

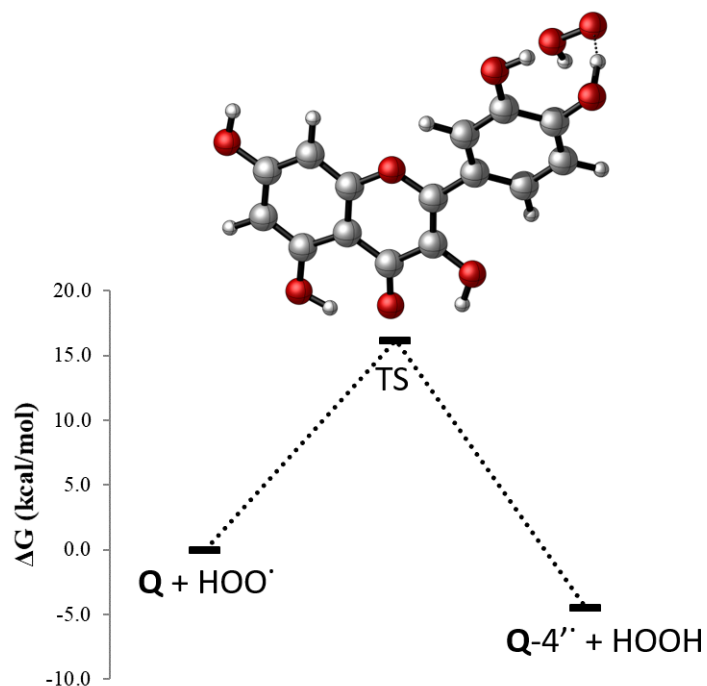

**Supplementary Figure 3.** Gibbs free energy profile of the hydrogen atom transfer reaction between Q and HOO· at the 4'-OH position. The structure of the corresponding transition state is shown at the top.

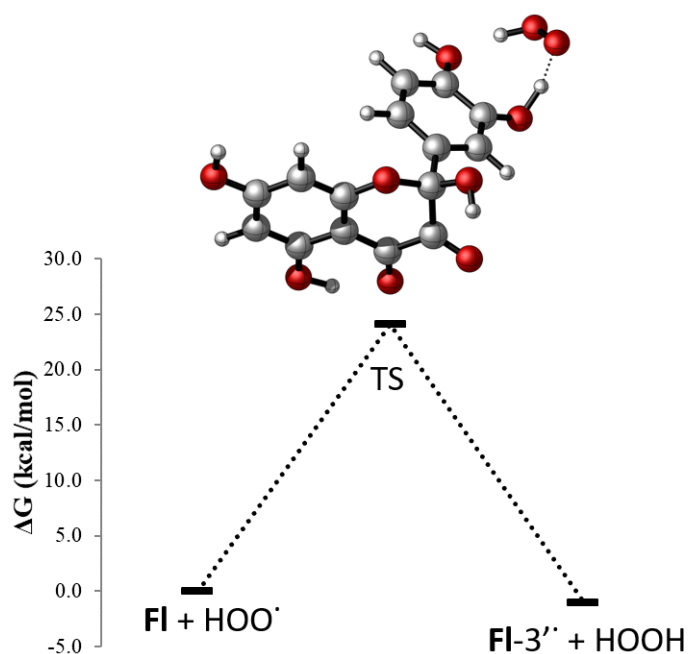

**Supplementary Figure 4.** Gibbs free energy profile of the hydrogen atom transfer reaction between FI and HOO· at the 3'-OH position. The structure of the corresponding transition state is shown at the top.



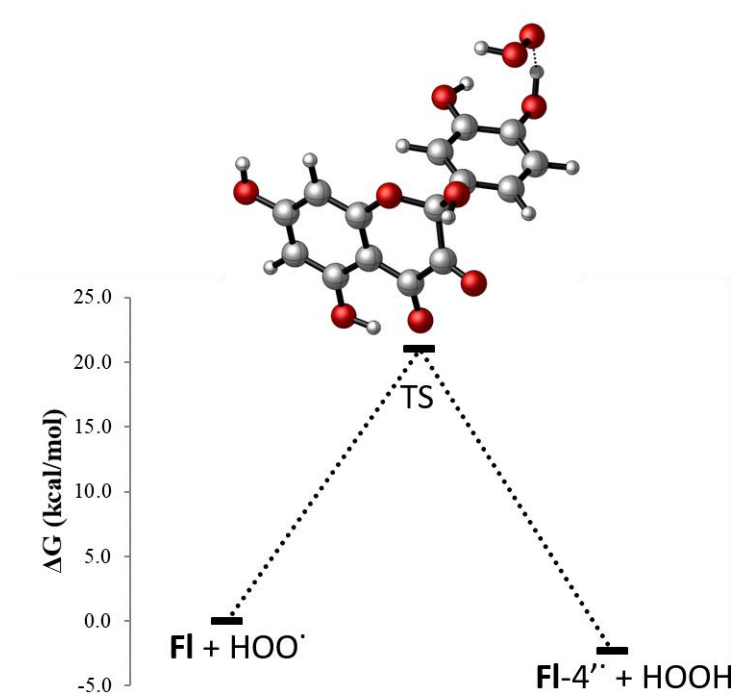

**Supplementary Figure 5.** Gibbs free energy profile of the hydrogen atom transfer reaction between **FI** and HOO· at the 4'-OH position. The structure of the corresponding transition state is shown at the top.

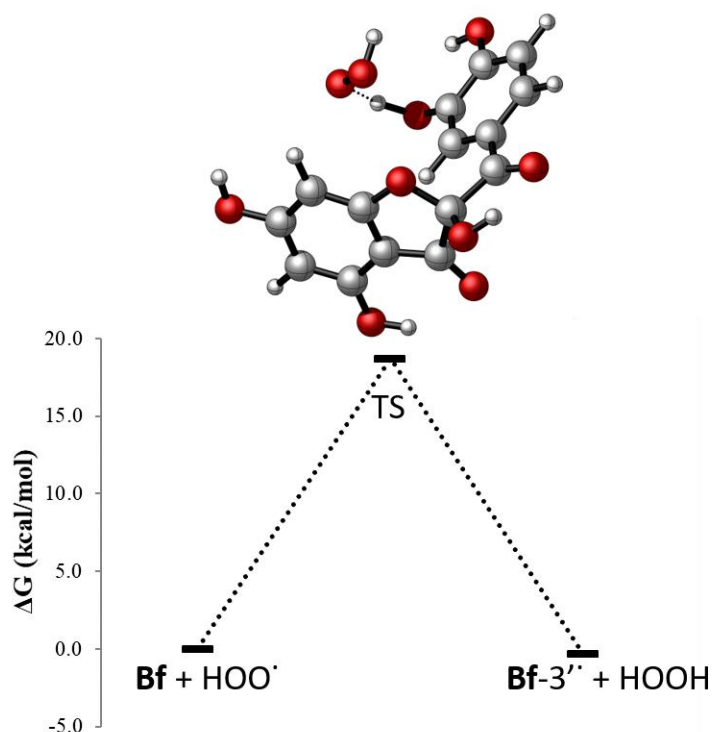

**Supplementary Figure 6.** Gibbs free energy profile of the hydrogen atom transfer reaction between **Bf** and HOO· at the 3'-OH position. The structure of the corresponding transition state is shown at the top.
